# Supplementary material for: Machine-learning-assisted materials discovery using failed experiments
Source: Springer Nature journal article supplement (doi:10.1038/nature17439), 2016-05-03
Supplement: 41586_2016_BFnature17439_MOESM230_ESM.pdf [file 41586_2016_BFnature17439_MOESM230_ESM.pdf]

**Table S1.** Inorganic atom property descriptors used in this study. (C) indicates values computed by us; (M) indicates values obtained directly from Mathematica 10; (M,C) indicates values that were computed by using the equation shown based on Mathematica 10 inputs.

| Property name                 | Description                                                                                                                     |
|-------------------------------|---------------------------------------------------------------------------------------------------------------------------------|
| numberInorganic               | number of inorganic reagents used in this reaction (C)                                                                          |
| IonizationMax                 | maximum ionization energy, <i>IP</i> , of all inorganic atom types present in this reaction (M)                                 |
| IonizationMin                 | minimum <i>IP</i> of all inorganic atoms in this reaction                                                                       |
| IonizationMean                | arithmetic average (mean) of <i>IP</i> for all inorganic atoms in this reaction                                                 |
| IonizationGeom                | geometric average of <i>IP</i> for all inorganic atoms in this reaction                                                         |
| IonizationMaxWeighted         | maximum mole-weighted <i>IP</i> (M)                                                                                             |
| IonizationMinWeighted         | minimum mole-weighted <i>IP</i>                                                                                                 |
| IonizationMeanWeighted        | maximum mole-weighted <i>IP</i>                                                                                                 |
| IonizationGeomWeighted        | maximum mole-weighted <i>IP</i>                                                                                                 |
| EAMax                         | maximum electron affinity, <i>EA</i> (M)                                                                                        |
| EAMin                         |                                                                                                                                 |
| EAMean                        |                                                                                                                                 |
| EAGeom                        |                                                                                                                                 |
| EAMaxWeighted                 |                                                                                                                                 |
| EAMinWeighted                 |                                                                                                                                 |
| EAMeanWeighted                |                                                                                                                                 |
| EAGeomWeighted                |                                                                                                                                 |
| PaulingElectronegMax          | maximum Pauling Electronegativity, $\chi_{Pauling}$ (M)                                                                         |
| PaulingElectronegMin          |                                                                                                                                 |
| PaulingElectronegMean         |                                                                                                                                 |
| PaulingElectronegGeom         |                                                                                                                                 |
| PaulingElectronegMaxWeighted  |                                                                                                                                 |
| PaulingElectronegMinWeighted  |                                                                                                                                 |
| PaulingElectronegMeanWeighted |                                                                                                                                 |
| PaulingElectronegGeomWeighted |                                                                                                                                 |
| PearsonElectronegMax          | maximum Pearson (Mulliken) electronegativity, $\chi = (IP + EA)/2$ , of all inorganic atom types present in this reaction (C,M) |
| PearsonElectronegMin          |                                                                                                                                 |
| PearsonElectronegMean         |                                                                                                                                 |
| PearsonElectronegGeom         |                                                                                                                                 |

**Table S1 Continued.** Inorganic atom property descriptors used in this study. (C) indicates values computed by us; (M) indicates values obtained directly from Mathematica 10; (M,C) indicates values that were computed by using the equation shown based on Mathematica 10 inputs.

| Property name                 | Description                               |
|-------------------------------|-------------------------------------------|
| PearsonElectronegMaxWeighted  |                                           |
| PearsonElectronegMinWeighted  |                                           |
| PearsonElectronegMeanWeighted |                                           |
| PearsonElectronegGeomWeighted |                                           |
| hardnessMax                   | maximum hardness, $\eta=(IP-EA)/2$ (C, M) |
| hardnessMin                   |                                           |
| hardnessMean                  |                                           |
| hardnessGeom                  |                                           |
| hardnessMaxWeighted           |                                           |
| hardnessMinWeighted           |                                           |
| hardnessMeanWeighted          | maximum hardness, $\eta=(IP-EA)/2$ (C, M) |
| hardnessGeomWeighted          |                                           |
| AtomicRadiusMax               |                                           |
| AtomicRadiusMin               |                                           |
| AtomicRadiusMean              |                                           |
| AtomicRadiusGeom              |                                           |
| AtomicRadiusMaxWeighted       |                                           |
| AtomicRadiusMinWeighted       |                                           |
| AtomicRadiusMeanWeighted      |                                           |
| AtomicRadiusGeomWeighted      |                                           |
| AtomicRadiusGeom              |                                           |

**Table S2.** Stoichiometry ratio properties.

| Property name            | Description                                                                                                                                  |
|--------------------------|----------------------------------------------------------------------------------------------------------------------------------------------|
| inorg-water-moleratio    | total moles of all inorganic reagents divided by moles of water                                                                              |
| inorg-org-moleratio      | total moles of all inorganic reagents divided by total moles of all organic reactants                                                        |
| org-water-moleratio      | total moles of all organic reagents divided by total moles of all water                                                                      |
| orgacc-waterdonratio     | Ratio of the number of moles of hydrogen bond acceptors on the organic to number of mole of hydrogen bond donors on water at the reaction pH |
| orgdon-wateracccratio    | Ratio of the number of moles of hydrogen bond donors on the organic to number of mole of hydrogen bond acceptors on water at the reaction pH |
| notwater-water-moleratio | total moles of all reagents that are not water (i.e., inorganic + organic + oxalate-like) divided by moles of water                          |

**Table S3.** Reaction condition properties, as entered from lab notebooks.

| Property name | Description                                     |
|---------------|-------------------------------------------------|
| Temp_max      | Maximum temperature for the reaction in Celcius |
| time          | Reaction time in hours                          |
| slowcool      | (logical) was a slow cool performed?            |
| pH            | initial reaction pH                             |
| leak          | (logical) did a leak occur?                     |

**Table S4.** Organic molecule properties, as computed using ChemAxon.

| Property name                | Description                                                                                                                                                       |
|------------------------------|-------------------------------------------------------------------------------------------------------------------------------------------------------------------|
| orgavgpolMax                 | maximum value of average molecular polarizability (avgpol) for all organic components evaluated using the nominal molecular structure                             |
| orgavgpolMin                 | minimum value of average molecular polarizability (avgpol) for all organic components evaluated using the nominal molecular structure                             |
| orgavgpolMean                | arithmetic mean of average molecular polarizability (avgpol) for all organic components evaluated using the nominal molecular structure                           |
| orgavgpolGeom                | geometric mean of average molecular polarizability (avgpol) for all organic components evaluated using nominal molecular structure                                |
| orgavgpol_pHdependentMax     | maximum value of average molecular polarizability (avgpol) for all organic components evaluated using the major microspecies at the reaction pH                   |
| orgavgpol_pHdependentMin     |                                                                                                                                                                   |
| orgavgpol_pHdependentMean    |                                                                                                                                                                   |
| orgavgpol_pHdependentGeom    |                                                                                                                                                                   |
| orgrefractivityMax           | maximum value of refractivity (refractivity) for all organic components                                                                                           |
| orgrefractivityMin           |                                                                                                                                                                   |
| orgrefractivityMean          |                                                                                                                                                                   |
| orgrefractivityGeom          |                                                                                                                                                                   |
| orgmaximalprojectionAreaMax  | maximum value of the maximal projection area (maximalprojectionarea) for all organic components, using default settings for conformer generation and optimization |
| orgmaximalprojectionAreaMin  |                                                                                                                                                                   |
| orgmaximalprojectionAreaMean |                                                                                                                                                                   |
| orgmaximalprojectionAreaGeom |                                                                                                                                                                   |

**Table S4 Continued.** Organic molecule properties, as computed using ChemAxon.

| Property name                  | Description                                                                                                                                                                                                                        |
|--------------------------------|------------------------------------------------------------------------------------------------------------------------------------------------------------------------------------------------------------------------------------|
| orgmaximalprojectionradiusMax  | maximum value of the maximal p<br>rojection radius                                                                                                                                                                                 |
| orgmaximalprojectionradiusMin  | (maximalprojectionradius) for all organic<br>components, using default settings for<br>conformer generation and<br>optimization                                                                                                    |
| orgmaximalprojectionradiusMean |                                                                                                                                                                                                                                    |
| orgmaximalprojectionradiusGeom |                                                                                                                                                                                                                                    |
| orgmaximalprojectionsizeMax    | maximum value of the size of the molecule<br>perpendicular to the maximal projection area<br>surface (maximalprojectionsize) for all organic<br>components,<br>using default settings for conformer<br>generation and optimization |
| orgmaximalprojectionsizeMin    |                                                                                                                                                                                                                                    |
| orgmaximalprojectionsizeMean   |                                                                                                                                                                                                                                    |
| orgmaximalprojectionsizeGeom   |                                                                                                                                                                                                                                    |
| orgminimalprojectionareaMax    | maximum value of the minimal projection area<br>(minimalprojectionarea) for all organic<br>components,<br>using default settings for conformer<br>generation and optimization                                                      |
| orgminimalprojectionareaMin    |                                                                                                                                                                                                                                    |
| orgminimalprojectionareaMean   |                                                                                                                                                                                                                                    |
| orgminimalprojectionareaGeom   |                                                                                                                                                                                                                                    |
| orgminimalprojectionradiusMax  | maximum value of the minimal<br>projection radius (minimalprojectionradius)<br>for all organic components, using default<br>settings for conformer generation and<br>optimization                                                  |
| orgminimalprojectionradiusMin  |                                                                                                                                                                                                                                    |
| orgminimalprojectionradiusMean |                                                                                                                                                                                                                                    |
| orgminimalprojectionradiusGeom |                                                                                                                                                                                                                                    |
| orgminimalprojectionsizeMax    | maximum value of the size of the molecule<br>perpendicular to the minimal projection area<br>surface (minimalprojectionsize) for all organic<br>components, using default settings for<br>conformer generation and optimization    |
| orgminimalprojectionsizeMin    |                                                                                                                                                                                                                                    |

**Table S4.** Organic molecule properties, as computed using ChemAxon.

| Property name                                                                | Description                                                                                                                                                                                                 |
|------------------------------------------------------------------------------|-------------------------------------------------------------------------------------------------------------------------------------------------------------------------------------------------------------|
| orgminimalprojectionsizeMean<br>orgminimalprojectionsizeGeom<br>orgmolpolMax | maximum value of the molecular polarizability (molpol -H ) for all organic components, using the major microspecies at the reaction pH                                                                      |
| orgmolpolMin<br>orgmolpolMean<br>orgmolpolGeom<br>orgvanderwaalsMax          |                                                                                                                                                                                                             |
| orgvanderwaalsMin<br>orgvanderwaalsMean<br>orgvanderwaalsGeom                |                                                                                                                                                                                                             |
| orgASAMax<br>orgASAMin<br>orgASAMean<br>orgASAGeom<br>orgASA+Max             |                                                                                                                                                                                                             |
| orgASA+Min<br>orgASA+Mean<br>orgASA+Geom<br>orgASA-Max                       | maximum value of the water accessible surface area of all atoms with positive partial charge (molecularsurfacearea -t ASA+ -H ) for all organic components, using the major microspecies at the reaction pH |
| orgASA-Min<br>orgASA-Mean<br>orgASA-Geom                                     | maximum value of the water accessible surface area of all atoms with negative partial charge (molecularsurfacearea -t ASA- -H ) for all organic components, using the major microspecies at the reaction pH |

**Table S4.** Organic molecule properties, as computed using ChemAxon.

| Property name           | Description                                                                                                                                                                                 |
|-------------------------|---------------------------------------------------------------------------------------------------------------------------------------------------------------------------------------------|
| orgASA_HMax             | maximum value of the water accessible surface area of all hydrophobic atoms (molecularsurfacearea -t ASA_H -H ) for all organic components, using the major microspecies at the reaction pH |
| orgASA_HMin             |                                                                                                                                                                                             |
| orgASA_HMean            |                                                                                                                                                                                             |
| orgASA_HGeom            |                                                                                                                                                                                             |
| orgASA_PMax             | maximum value of the water accessible surface area of all polar atoms (molecularsurfacearea -t ASA_P -H ) for all organic components, using the major microspecies at the reaction pH       |
| orgASA_PMin             |                                                                                                                                                                                             |
| orgASA_PMean            |                                                                                                                                                                                             |
| orgASA_PGeom            |                                                                                                                                                                                             |
| orgpolarsurfaceareaMax  | maximum value of the 2D topological polar surface area (polarsurfacearea -H ) for all organic components, using the major microspecies at the reaction pH                                   |
| orgpolarsurfaceareaMin  |                                                                                                                                                                                             |
| orgpolarsurfaceareaMean |                                                                                                                                                                                             |
| orgpolarsurfaceareaGeom |                                                                                                                                                                                             |
| orghbdamsaccMax         | maximum value of the number of hydrogen bond acceptors (hbda -t acc) for all organic components, using the major microspecies at the reaction pH                                            |
| orghbdamsaccMin         |                                                                                                                                                                                             |
| orghbdamsaccMean        |                                                                                                                                                                                             |
| orghbdamsaccGeom        |                                                                                                                                                                                             |
| orghbdamsdonMax         | maximum value of the number of hydrogen bond donors (hbda -t don) for all organic components, using the major microspecies at the reaction pH                                               |
| orghbdamsdonMin         |                                                                                                                                                                                             |
| orghbdamsdonMean        |                                                                                                                                                                                             |
| orghbdamsdonGeom        |                                                                                                                                                                                             |



**Table S5.** Model evaluation results.

| Technique (all from Weka library)     | 2-class accuracy (%) <sup>a</sup> |
|---------------------------------------|-----------------------------------|
| Decision tree (J48)                   | 67.5                              |
| Random forest (size 100 and 1000)     | 69.8, 70.5                        |
| Logistic regression                   | 69.2                              |
| k-Nearest neighbors (K = 1, 2, and 3) | 69.1, 66.9, 68.4                  |
| SMO SVM                               | 74.1                              |

Reported test set accuracy is the average over 15 training/test splits where each split is created so that (inorganic, inorganic, organic) triplets are in either the training set or the test set. The specific model names and parameters can be found in the supplementary script `generate_weka_models.sh`.

**Table S6.** SVM learning curve.

| Training set size | Accuracy (%) |
|-------------------|--------------|
| 276               | 70.3         |
| 552               | 70.6         |
| 828               | 71.2         |
| 1104              | 72.0         |
| 1380              | 73.0         |
| 1656              | 73.0         |
| 1932              | 73.3         |
| 2208              | 73.7         |
| 2484              | 73.8         |
| 2756.1            | 74.1         |

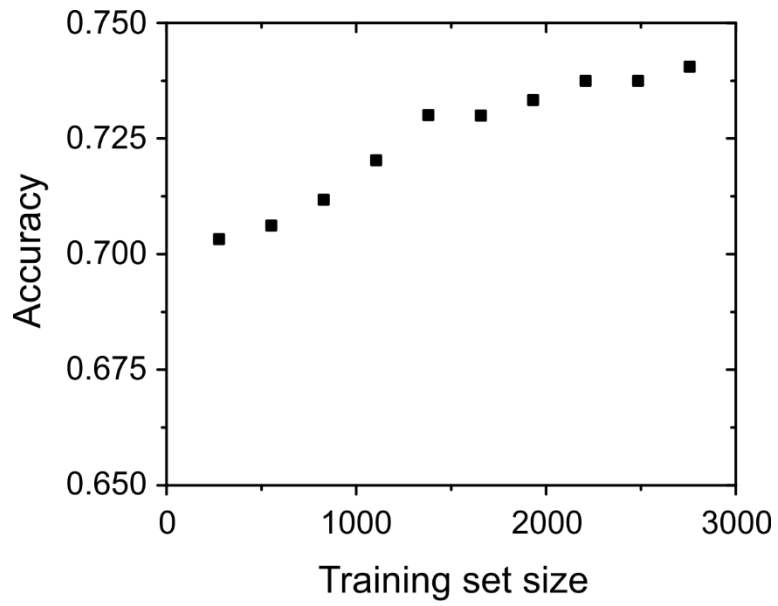

**Figure S1.** SVM learning curve plot.

## Feature Selection Details.

Feature selection was performed using the Weka library's CfsSubsetEval with two different selection methods: best-first and greedy stepwise. Then an SVM was trained and tested using just the selected features. This resulted in an accuracy of 70.7% (best-first) and 71.6% (greedy stepwise). More details are below.

The two methods of feature selection returned different sets of descriptors. While individual descriptor identities differ between methods, the collected sets of descriptors are essentially the same, given correlations between descriptors. Both methods include descriptors for inorganic composition (hardnessMaxWeighted, AtomicRadiusMeanWeighted, PaulingElectronegMean, hardnessMinWeighted, EAMinWeighted), organic amine size (orgvanderwaalsMin, orgASA+Min, orgASA\_HGeomAvg, orgvanderwaalsArithAvg), amine hydrogen-bonding properties (orghbdamsdonGeomAvg, orghbdamsaccMax). Feature selection using CfsSubsetEval greedy stepwise selection also returns reaction condition descriptors (time, leak, Temp\_max).

### CfsSubsetEval best-first selection.

Feature selection results via the Weka library's CfsSubsetEval with best-first selection. An SMO SVM model trained on the resulting 6 features yields an accuracy of 70.7%. The more specific parameter settings and results are below:

Search method:

- Best first.
- Start set: no attributes
- Search direction: forward
- Stale search after 5 node expansions
- Total number of subsets evaluated: 38
- Merit of best subset found: 0.091

Attribute Subset Evaluator (supervised, Class (nominal): outcome):

- CFS Subset Evaluator
- Treating missing values as a separate value
- Including locally predictive attributes

Selected attributes:

- orgvanderwaalsMin
- orgASA+Min
- orghbdamsdonGeomAvg
- PaulingElectronegMean
- hardnessMaxWeighted
- AtomicRadiusMeanWeighted

### CfsSubsetEval greedy stepwise selection.

The feature selection above uses Weka's CfsSubsetEval with their best-first selection method that searches the space of possible subsets using beam search. However, best-first selection can not generate a ranked list of features, and does not grant direct control over the number of descriptors included in the subset of selected features. In order to consider the effect of including more features, we used Weka's CfsSubsetEval with the GreedyStepwise selection method that implements hill climbing. The results and more specific parameter settings are below.

Search Method:

Greedy Stepwise (forwards).  
Start set: no attributes

Ranking is the order that attributes were added, starting with no attributes. The merit scores in the left column are the goodness of the subset after adding the corresponding attribute in the right column to the subset.

Attribute Subset Evaluator (supervised, Class (nominal): outcome):

CFS Subset Evaluator  
Treating missing values as a separate value  
Including locally predictive attributes

Resulting features (top 6):

time  
hardnessMinWeighted  
orgASA\_HGeomAvg  
leak  
inorg-water-moleratio  
orgvanderwaalsArithAvg

Resulting features (top 9):

time  
hardnessMinWeighted  
orgASA\_HGeomAvg  
leak  
inorg-water-moleratio  
orgvanderwaalsArithAvg  
orghbdamsaccMax  
Temp\_max  
EAMinWeighted

The resulting top 6 features have an accuracy of 71.6% when an SVM is trained using only these 6 features and evaluated as an average of 15 splits constructed as described previously. The top 9 features create an SVM with an accuracy of 71.5%.

**Table S7.** Amine names and similarity indices for the 34 ‘untested’ amines.

| Amine                                                                   | Similarity index |
|-------------------------------------------------------------------------|------------------|
| 2-(Aminomethyl)-1-ethylpyrrolidine                                      | 1                |
| N-Methylethylenediamine                                                 | 0.846            |
| 2,3-Dimethylpiperazine                                                  | 0.831            |
| N-Propylethylenediamine                                                 | 0.806            |
| 1-Butylpiperazine                                                       | 0.770            |
| N,N'-Dimethyl-1,3-propanediamine                                        | 0.750            |
| N,N'-Dimethyl-1,6-hexanediamine                                         | 0.750            |
| N-Methyl-1,3-diaminopropane                                             | 0.750            |
| 1-(2-Aminoethyl)pyrrolidine                                             | 0.721            |
| 2-Amino-5-diethylaminopentane                                           | 0.710            |
| 3-(Dibutylamino)propylamine                                             | 0.702            |
| N-Propyl-1,3-propanediamine                                             | 0.697            |
| N,N-Dimethyl-3-pyrrolidinamine                                          | 0.688            |
| N-Isopropyl-1,3-propanediamine                                          | 0.676            |
| 2-(Aminomethyl)piperidine                                               | 0.664            |
| 1-(2-Aminoethyl)piperidine                                              | 0.663            |
| 1,3-Cyclohexanebis(methylamine), mixture of isomers                     | 0.652            |
| 1-(3-aminopropyl)pyrrolidine                                            | 0.650            |
| N,N,N',N'-Tetramethyl-1,4-butanediamine                                 | 0.643            |
| 4-(1-Pyrrolidinyl)piperidine                                            | 0.636            |
| N,N,N',N'-Tetramethyl-1,3-butanediamine                                 | 0.636            |
| 1-Octylpiperazine                                                       | 0.635            |
| 4-Aminopiperidine                                                       | 0.621            |
| 4,4'-Methylenebis(2-methylcyclohexylamine), mixture of isomers          | 0.620            |
| 4-(Aminomethyl)piperidine                                               | 0.594            |
| 2-(2-Aminoethyl)-1-methylpyrrolidine                                    | 0.593            |
| 2-aminopiperidine                                                       | 0.587            |
| N,N,N'-Trimethyl-1,3-propanediamine                                     | 0.556            |
| N,N,N',N'-Tetramethyl-1,3-propanediamine                                | 0.556            |
| 5-Amino-1,3,3-trimethylcyclohexanemethylamine, mixture of cis and trans | 0.554            |
| 3-(aminomethyl)piperidine                                               | 0.553            |
| 3-(Dimethylamino)-1-propylamine                                         | 0.545            |
| 4-Amino-2,2,6,6-tetramethylpiperidine                                   | 0.541            |
| N,N,2,2-Tetramethyl-1,3-propanediamine                                  | 0.478            |

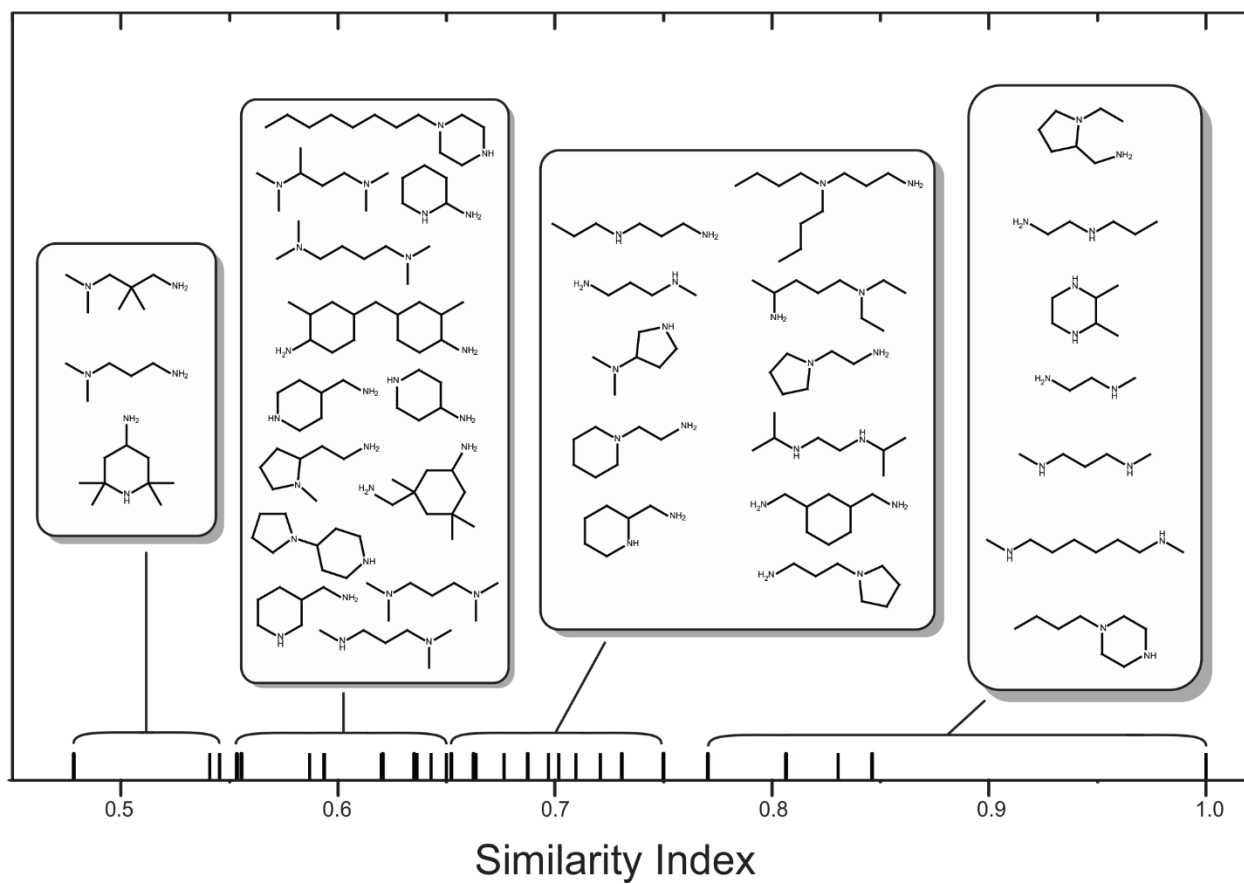

**Figure S2.** Amine similarity index distribution for the 34 'untested' amines.





## Experimental Details.

**Materials.**  $\text{NH}_4\text{VO}_3$  (99 %),  $\text{NaVO}_3$  (anhydrous, 99.9 %),  $\text{SeO}_2$  (99.4 %), 1,3-Diaminopropane ( $\geq 99$  %),  $\text{Na}_2\text{C}_2\text{O}_4$  (99.5 %) and triethylenetetramine ( $\geq 99$  %) were purchased from Sigma-Aldrich. All reagents were used as received. Deionized water was used in these syntheses.

**Syntheses.** All reactions were conducted in either 23 mL poly(fluoro-ethylene-propylene) lined pressure vessels or 15 mL polypropylene bottles. Initial reaction pHs were controlled by the addition of 4 M HCl and 4 M NaOH. The reactions were heated to a set temperature and allowed to soak. The reactions were then cooled to room temperature at a rate of  $6\text{ }^\circ\text{C h}^{-1}$  to promote the growth of large single crystals. Autoclaves and bottles were opened in air, and products were recovered through vacuum filtration.

$[\text{C}_3\text{H}_{12}\text{N}_2][\text{V}_3\text{O}_5(\text{SeO}_3)_3]\cdot\text{H}_2\text{O}$  (**1**). **1** was synthesized as sheet-like black-green crystals through the reaction of 0.1109 g ( $1.00 \times 10^{-3}$  mol)  $\text{NH}_4\text{VO}_3$ , 1.1102 g ( $1.00 \times 10^{-2}$  mol)  $\text{SeO}_2$ , 0.4443 g ( $6.00 \times 10^{-3}$  mol) 1,3-diaminopropane, and 7.3860 g ( $4.10 \times 10^{-1}$  mol)  $\text{H}_2\text{O}$ . The reaction was heated at  $110\text{ }^\circ\text{C}$  for 30 h in 23 mL poly(fluoro-ethylene-propylene) lined pressure vessels; initial pH was set to 3.

$[\text{C}_6\text{H}_{22}\text{N}_4][\text{VO}(\text{C}_2\text{O}_4)(\text{SeO}_3)]_2\cdot 2\text{H}_2\text{O}$  (**2**). **2** was synthesized as blue plates through the reaction of 0.1283 g ( $1.11 \times 10^{-3}$  mol)  $\text{NaVO}_3$ , 0.9292 g ( $8.40 \times 10^{-3}$  mol)  $\text{SeO}_2$ , 0.1709 g ( $1.90 \times 10^{-3}$  mol) triethylenetetramine, 0.1395 g ( $1.04 \times 10^{-3}$  mol)  $\text{Na}_2\text{C}_2\text{O}_4$  and 6 g ( $3.32 \times 10^{-1}$  mol)  $\text{H}_2\text{O}$ . The reaction was heated at  $90\text{ }^\circ\text{C}$  for 24 h in a 15 mL polypropylene bottle. The initial reaction pH was set to 4.

**Single Crystal X-ray Diffraction.** Data were collected using a Bruker AXS Smart Apex or Apex II CCD diffractometer with Mo- $\text{K}\alpha$  radiation ( $\lambda = 0.71073\text{ \AA}$ ). A single crystal was mounted on a Mitegen micromesh mount using a trace of mineral oil and cooled *in-situ* to 100(2) K for data collection. Frames were collected, reflections were indexed, processed and the files scaled and corrected for absorption using APEX2.<sup>1</sup> The heavy atom positions were determined using SIR92.<sup>2</sup> All other non-hydrogen sites were located from Fourier difference maps. All non-hydrogen sites were refined using anisotropic thermal parameters using full matrix least squares procedures on  $F_o^2$  with  $I > 3\sigma(I)$ . Hydrogen atoms were placed in geometrically idealized positions. All calculations were performed using Crystals v. 14.23c.<sup>3</sup> Relevant crystallographic data are listed in Table S8.

**Table S8.** Crystallographic data for compounds 1 and 2.

| Compound                            | [C <sub>3</sub> H <sub>12</sub> N <sub>2</sub> ][V <sub>3</sub> O <sub>5</sub> (SeO <sub>3</sub> ) <sub>3</sub> ]·H <sub>2</sub> O ( <b>1</b> ) | [C <sub>6</sub> H <sub>22</sub> N <sub>4</sub> ][VO(C <sub>2</sub> O <sub>4</sub> )(SeO <sub>3</sub> )] <sub>2</sub> ·2H <sub>2</sub> O ( <b>2</b> ) |
|-------------------------------------|-------------------------------------------------------------------------------------------------------------------------------------------------|------------------------------------------------------------------------------------------------------------------------------------------------------|
| Formula                             | C <sub>3</sub> H <sub>14</sub> N <sub>2</sub> O <sub>15</sub> Se <sub>3</sub> V <sub>3</sub>                                                    | C <sub>10</sub> H <sub>26</sub> N <sub>4</sub> O <sub>18</sub> Se <sub>2</sub> V <sub>2</sub>                                                        |
| fw                                  | 707.85                                                                                                                                          | 750.13                                                                                                                                               |
| Space group                         | <i>P</i> 2 <sub>1</sub> / <i>m</i> (no. 12)                                                                                                     | <i>P</i> 2 <sub>1</sub> / <i>c</i> (no. 14)                                                                                                          |
| <i>a</i> / Å                        | 6.3205(8)                                                                                                                                       | 12.6854(15)                                                                                                                                          |
| <i>b</i> / Å                        | 19.766(3)                                                                                                                                       | 6.3408(7)                                                                                                                                            |
| <i>c</i> / Å                        | 13.2127(17)                                                                                                                                     | 14.1903(17)                                                                                                                                          |
| $\alpha$ / °                        | 90                                                                                                                                              | 90                                                                                                                                                   |
| $\beta$ / °                         | 97.314(2)                                                                                                                                       | 95.9912(15)                                                                                                                                          |
| $\gamma$ / °                        | 90                                                                                                                                              | 90                                                                                                                                                   |
| <i>V</i> / Å <sup>3</sup>           | 1637.3(4)                                                                                                                                       | 1135.2(2)                                                                                                                                            |
| <i>Z</i>                            | 4                                                                                                                                               | 2                                                                                                                                                    |
| $\rho_{\text{calc}}$                | 2.871                                                                                                                                           | 2.194                                                                                                                                                |
| $\lambda$ / Å                       | 0.71073                                                                                                                                         | 0.71073                                                                                                                                              |
| <i>T</i> / K                        | 100(2)                                                                                                                                          | 100(2)                                                                                                                                               |
| $\mu$ / mm <sup>-1</sup>            | 8.429                                                                                                                                           | 4.125                                                                                                                                                |
| <i>R</i> <sub>1</sub> <sup>a</sup>  | 0.0337                                                                                                                                          | 0.0184                                                                                                                                               |
| <i>wR</i> <sub>2</sub> <sup>b</sup> | 0.0803                                                                                                                                          | 0.0463                                                                                                                                               |

$$^a R_1 = \frac{\sum \| |F_o| - |F_c| \|}{\sum |F_o|}, \quad ^b wR_2 = \frac{[\sum w(F_o^2 - F_c^2)^2]}{[\sum w(F_o^2)^2]}^{1/2}.$$

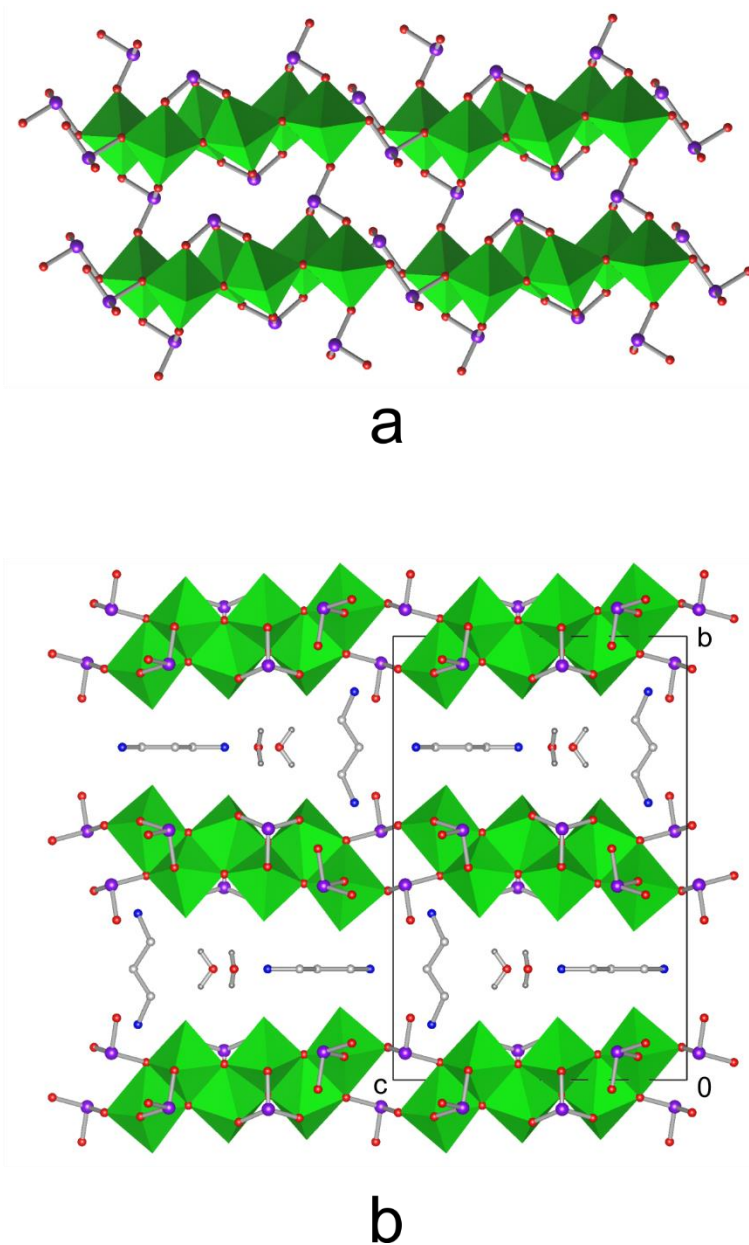

**Figure S4.** (a)  $[V_3O_5(SeO_3)_3]^{2n-}$  layer topology and (b) three-dimensional packing in  $[C_3H_{12}N_2][V_3O_5(SeO_3)_3] \cdot H_2O$  (1). Green octahedra represent  $[VO_6]$  while purple, red, blue, white and gray spheres represent selenium, oxygen, nitrogen, carbon and hydrogen, respectively. Organic cation hydrogen atoms have been omitted for clarity.

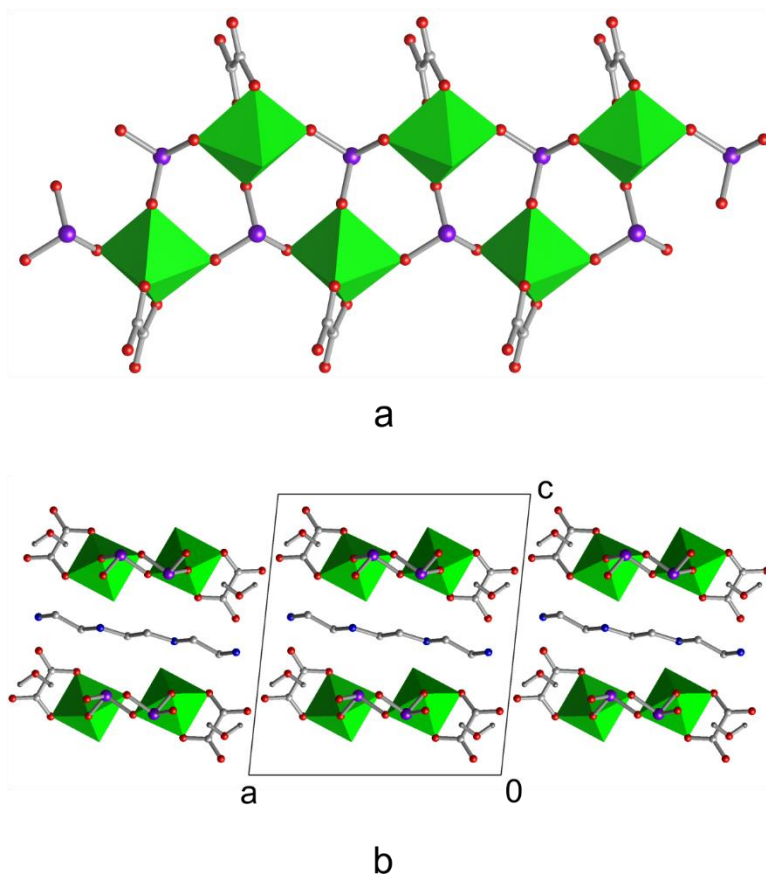

**Figure S5.** (a)  $[\text{VO}(\text{C}_2\text{O}_4)(\text{SeO}_3)]_n^{2n-}$  chain connectivity and (b) three-dimensional packing in  $[\text{C}_6\text{H}_{22}\text{N}_4][\text{VO}(\text{C}_2\text{O}_4)(\text{SeO}_3)]_2 \cdot 2\text{H}_2\text{O}$  (2). Green octahedra represent  $[\text{VO}_6]$  while purple, red, blue, white and gray spheres represent selenium, oxygen, nitrogen, carbon and hydrogen, respectively. Organic cation hydrogen atoms have been omitted for clarity.

**Table S9.** Bond valence sums for  $[\text{C}_3\text{H}_{12}\text{N}_2][\text{V}_3\text{O}_5(\text{SeO}_3)_3]\cdot\text{H}_2\text{O}$  (**1**).

| $S_i$        | V1   | V2   | V3   | Se1  | Se2  | Se3  | Hydrogen bonds | $\Sigma S_i$ | $V - \Sigma S_i$ |
|--------------|------|------|------|------|------|------|----------------|--------------|------------------|
| O1           | 1.66 |      |      |      |      |      |                | 1.66         | -0.34            |
| O2           | 0.69 | 0.20 | 1.12 |      |      |      |                | 2.01         | 0.01             |
| O3           | 0.56 |      |      | 1.33 |      |      |                | 1.89         | -0.11            |
| O4           | 0.60 |      |      |      | 1.26 |      |                | 1.86         | -0.14            |
| O5           | 0.57 |      |      | 1.42 |      |      |                | 1.99         | -0.01            |
| O6           | 0.14 | 0.65 |      |      | 1.18 |      |                | 1.97         | -0.03            |
| O7           |      | 1.73 |      |      |      |      |                | 1.73         | -0.27            |
| O8           |      | 0.61 |      |      |      | 1.35 |                | 1.97         | -0.03            |
| O9           |      | 1.16 | 0.26 |      |      |      |                | 2.08         | 0.08             |
|              |      |      | 0.66 |      |      |      |                |              |                  |
| O10          |      | 0.66 |      | 1.30 |      |      |                | 1.96         | -0.04            |
| O11          |      |      | 1.72 |      |      |      |                | 1.72         | -0.28            |
| O12          |      |      | 0.62 |      |      | 1.34 |                | 1.97         | -0.03            |
| O13          |      |      | 0.64 |      |      | 1.27 |                | 1.91         | -0.09            |
| O14          |      |      |      |      | 1.48 |      |                | 1.48         | -0.52            |
| O15          |      |      |      |      |      |      | 1.6            | 1.6          | -0.4             |
| O16          |      |      |      |      |      |      | 1.6            | 1.6          | -0.4             |
| $\Sigma S_i$ | 4.22 | 5.02 | 5.03 | 4.05 | 3.92 | 3.97 |                |              |                  |

**Table S10.** Bond valence sums for  $[\text{C}_6\text{H}_{22}\text{N}_4][\text{VO}(\text{C}_2\text{O}_4)(\text{SeO}_3)]_2 \cdot 2\text{H}_2\text{O}$  (**2**).

| $S_i$        | V1   | Se1  | C1   | C2   | Hydrogen<br>bonds | $\Sigma S_i$ | $V - \Sigma S_i$ |
|--------------|------|------|------|------|-------------------|--------------|------------------|
| O1           | 1.59 |      |      |      |                   | 1.59         | -0.41            |
| O2           | 0.54 | 1.37 |      |      |                   | 1.91         | -0.09            |
| O3           | 0.51 |      | 1.32 |      |                   | 1.82         | -0.18            |
| O4           | 0.50 | 1.35 |      |      |                   | 1.85         | -0.15            |
| O5           | 0.55 | 1.34 |      |      |                   | 1.89         | -0.11            |
| O6           | 0.34 |      |      | 1.34 |                   | 1.68         | -0.32            |
| O7           |      |      | 1.55 |      |                   | 1.55         | -0.45            |
| O8           |      |      |      | 1.52 |                   | 1.52         | -0.48            |
| O9           |      |      |      |      | 1.6               | 1.6          | -0.4             |
| $\Sigma S_i$ | 4.02 | 4.06 |      |      |                   |              |                  |

- 1 Apex2 v2009.7-0. (Bruker AXS Inc., Madison (WI), USA, 2009).
- 2 Altomare, A., Casciarano, G., Giacovazzo, C. & Guagliardi, A. Completion and refinement of crystal structures with SIR92. *J. Appl. Crystallogr.* **26**, 343-350 (1993).
- 3 Betteridge, P. W., Carruthers, J. R., Cooper, R. I., Prout, K. & Watkin, D. J. CRYSTALS version 12: software for guided crystal structure analysis. *J. Appl. Crystallogr.* **36**, 1487 (2003).
